# Supplementary material for: TOLNet validation of satellite ozone profiles in the troposphere: impact of retrieval wavelengths
Source: Copernicus journal article supplement (doi:10.5194/amt-2023-195), 2023-09-15
Supplement: Supplementary file 1 [file amt-2023-195-supplement.pdf]

## Supplemental Text

Normalized mean biases (NMB, in ppb) were calculated with Eq. (S1)

$$NMB = \frac{\sum_{i=1}^N (R_i - O_i)}{\sum_{i=1}^N O_i} \quad (\text{S1})$$

5 where  $R_i$  are the retrievals and  $O_i$  are the observations for the  $i^{\text{th}}$  co-location and  $N$  is the total number of retrieval-observation co-locations. To calculate root mean squared error (RMSE, in ppb) we used Eq. (S2).

$$RMSE = \sqrt{\frac{1}{N} \sum_{i=1}^N (R_i - O_i)^2} \quad (\text{S2})$$

## Supplemental Figures

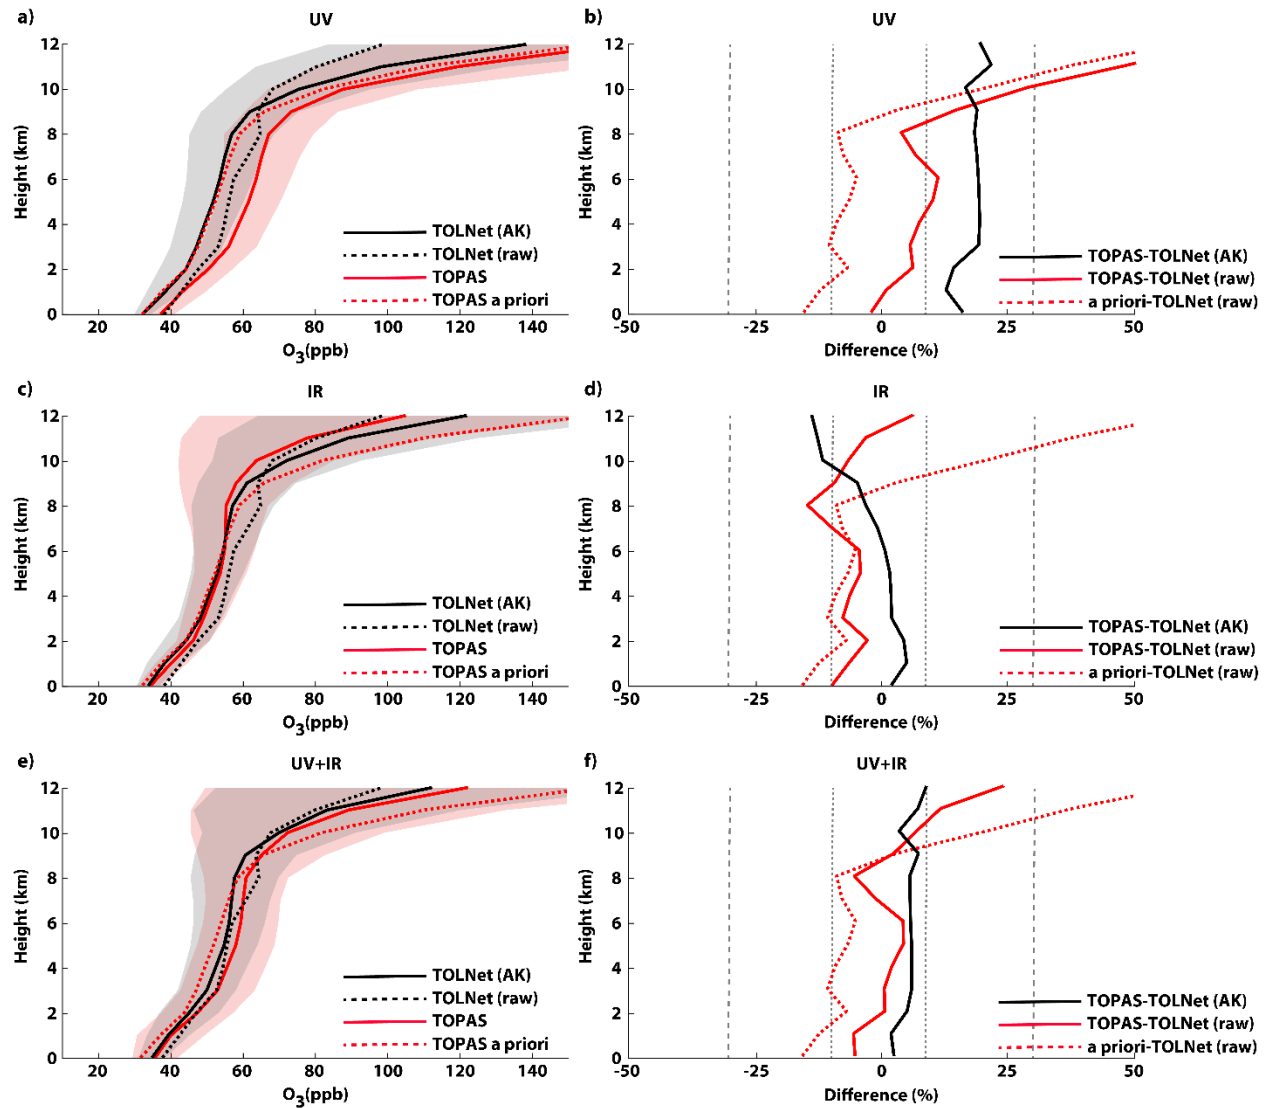

10 Figure S1. Vertical O<sub>3</sub> profile comparison of TOLNet interpolated to the satellite vertical grid (TOLNet-raw), TOLNet  
 convolved with the TROPOMI AK (TOLNet-AK), UV, IR, and UV+IR TOPAS satellite retrievals, and the a priori profile  
 information used in the TOPAS retrieval (total number of colocations (N) = 109). The direct comparison of the profiles and  
 percent difference for UV-only (a, c) IR-only (b, d), and UV+IR (e, f) retrievals are displayed, respectively, using the coarser  
 15 collocation criteria of 5 hour and 100 km. The percent difference between TOPAS satellite retrievals and TOLNet-AK and  
 TOLNet-raw are labeled as TOPAS-TOLNet (AK) and TOPAS-TOLNet (raw), respectively. The percent difference  
 between the TOPAS a priori and TOLNet-raw is labeled as a priori-TOLNet (raw). The grey and pink shaded regions  
 illustrate the 1 $\sigma$  standard deviation of TOLNet-AK and satellite O<sub>3</sub> vertical profiles, respectively. NMB values of 30% and  
 10% are displayed using grey dashed and dotted lines, respectively.

**Table S1. Statistical validation of TOPAS UV, IR, and UV+IR retrievals with convolved TOLNet-AK observations. All observations and satellite retrievals were co-located using 5 hour and 100 km threshold criteria.**

| <b>Prior</b>   |       |            |         |            |       |
|----------------|-------|------------|---------|------------|-------|
| Vertical Level | N (#) | Bias (ppb) | NMB (%) | RMSE (ppb) | Slope |
| 0-2 km         | 107   | -4.4       | -13.6   | 15.8       | 0.07  |
| 2-4 km         | 206   | -5.4       | -8.8    | 13.8       | 0.03  |
| 4-6 km         | 205   | -3.4       | -8.1    | 12.2       | 0.11  |
| 6-8 km         | 192   | -5.3       | -6.5    | 18.2       | 0.15  |
| 8-10 km        | 153   | 7.6        | -1.3    | 28.0       | 0.16  |
| 10-12 km       | 90    | 44.5       | 44.8    | 56.8       | 0.69  |
| Trop. Column   | 953   | 2.0        | -1.9    | 24.5       | 0.75  |
| <b>UV-only</b> |       |            |         |            |       |
| Vertical Level | N (#) | Bias (ppb) | NMB (%) | RMSE (ppb) | Slope |
| 0-2 km         | 107   | 5.5        | 14.2    | 11.7       | 0.41  |
| 2-4 km         | 206   | 9.1        | 18.8    | 14.0       | 0.11  |
| 4-6 km         | 205   | 9.9        | 19.0    | 15.4       | 0.20  |
| 6-8 km         | 192   | 10.2       | 18.7    | 16.1       | 0.44  |
| 8-10 km        | 153   | 11.8       | 18.3    | 17.7       | 0.82  |
| 10-12 km       | 90    | 23.7       | 18.8    | 30.7       | 0.91  |
| Trop. Column   | 953   | 10.9       | 17.5    | 17.2       | 0.84  |
| <b>IR-only</b> |       |            |         |            |       |
| Vertical Level | N (#) | Bias (ppb) | NMB (%) | RMSE (ppb) | Slope |
| 0-2 km         | 107   | 1.7        | 3.4     | 5.9        | 0.57  |
| 2-4 km         | 206   | 0.9        | 3.1     | 6.3        | 0.51  |
| 4-6 km         | 205   | 0.5        | 1.7     | 7.2        | 0.58  |
| 6-8 km         | 192   | -1.1       | -0.1    | 8.3        | 0.70  |
| 8-10 km        | 153   | -5.5       | -4.0    | 12.7       | 0.84  |
| 10-12 km       | 90    | -14.1      | -12.2   | 19.5       | 0.93  |
| Trop. Column   | 953   | -1.9       | -1.4    | 10.0       | 0.84  |
| <b>UV+IR</b>   |       |            |         |            |       |
| Vertical Level | N (#) | Bias (ppb) | NMB (%) | RMSE (ppb) | Slope |
| 0-2 km         | 107   | 1.5        | 2.1     | 10.3       | 0.51  |
| 2-4 km         | 206   | 3.0        | 5.4     | 11.4       | 0.42  |
| 4-6 km         | 205   | 3.2        | 5.9     | 11.7       | 0.41  |
| 6-8 km         | 192   | 3.2        | 5.6     | 10.9       | 0.55  |
| 8-10 km        | 153   | 3.5        | 6.4     | 15.4       | 0.92  |
| 10-12 km       | 90    | 7.9        | 5.3     | 26.7       | 1.10  |
| Trop. Column   | 953   | 3.5        | 5.1     | 14.1       | 0.87  |
